# Supplementary material for: β-MnO2 nanoparticles as heterogenous catalysts for aerobic oxidative transformation of alcohols to carbonyl compounds, nitriles, and amides
Source: Royal Society of Chemistry journal article supplement (doi:10.1039/d2cy01476a), 2022-01-01
Supplement: d2cy01476a1.pdf [file d2cy01476a1.pdf]

*Electronic Supplementary Information (ESI) for*

**$\beta$ -MnO<sub>2</sub> nanoparticles as heterogenous catalysts for aerobic oxidative transformation of alcohols to carbonyl compounds, nitriles, and amides**

Keigo Kamata,<sup>a\*</sup> Nanami Kinoshita,<sup>a</sup> Maki Koutani,<sup>a</sup> Ryusei Aono,<sup>a</sup> Eri Hayashi,<sup>a</sup> and Michikazu Hara<sup>a\*</sup>

<sup>a</sup> Laboratory for Materials and Structures, Institute of Innovative Research, Tokyo Institute of Technology, Nagatsuta-cho 4259, Midori-ku, Yokohama-city, Kanagawa, 226-8503, Japan. E-mail: kamata.k.ac@m.titech.ac.jp

**Table S1.** Additive-free aerobic tandem oxidation of benzyl alcohol (**1a**) to benzonitrile (**3a**) and benzamide (**4a**) with heterogeneous catalysts.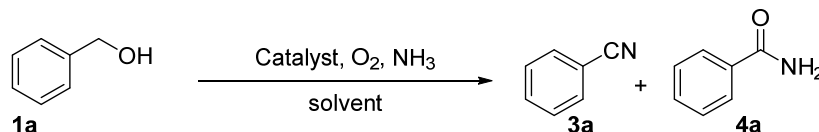

| entry          | catalyst                                            | solvent        | temperature (°C) | time (h) | O <sub>2</sub> (MPa) | yield (%) |           | remarks                                                                              | ref.      |
|----------------|-----------------------------------------------------|----------------|------------------|----------|----------------------|-----------|-----------|--------------------------------------------------------------------------------------|-----------|
|                |                                                     |                |                  |          |                      | <b>3a</b> | <b>4a</b> |                                                                                      |           |
| 1              | $\beta$ -MnO <sub>2</sub> nanoparticles             | toluene        | 130              | 1        | 0.3                  | 95        | –         | –                                                                                    | This Work |
| 2 <sup>a</sup> | NCI-Fe/Cu                                           | <i>t</i> -AmOH | 130              | 24       | 0.5                  | >99       | –         | decrease in activity                                                                 | S1        |
| 3              | La(OH) <sub>3</sub> /Fe <sub>3</sub> O <sub>4</sub> | 1,4-dioxane    | reflux           | 2        | 0.1<br>(balloon)     | 95        | –         | La leaching<br>decrease in activity                                                  | S2        |
| 4 <sup>b</sup> | Co-[Bmim]Br/C-700                                   | <i>t</i> -AmOH | 140              | 20       | 0.5                  | >99       | –         | –                                                                                    | S3        |
| 5 <sup>c</sup> | Co <sub>3</sub> O <sub>4</sub> -NGr/C               | <i>t</i> -AmOH | 130              | 18       | 0.5                  | 98        | –         | –                                                                                    | S4        |
|                | Fe <sub>2</sub> O <sub>3</sub> -NGr/C               | <i>t</i> -AmOH | 130              | 18       | 0.5                  | 98        | –         | –                                                                                    | S4        |
| 6 <sup>d</sup> | Co-[MCNIm]Cl/C-800                                  | <i>t</i> -AmOH | 130              | 24       | 0.5                  | 99        | –         | slight decrease in activity                                                          | S5        |
| 7 <sup>e</sup> | meso-Co-N/C                                         | <i>t</i> -AmOH | 130              | 18       | 0.5                  | 95        | –         | slight decrease in activity                                                          | S6        |
| 8 <sup>f</sup> | meso-N/C-900                                        | <i>t</i> -AmOH | 130              | 24       | 0.5                  | 90        | –         | –                                                                                    | S7        |
| 9 <sup>g</sup> | meso-N,B/C                                          | <i>t</i> -AmOH | 130              | 18       | 0.5                  | 9         | 83        | use of NH <sub>4</sub> OAc instead of NH <sub>3</sub><br>slight decrease in activity | S8        |
| 10             | amorphous MnO <sub>2</sub>                          | toluene        | 100              | 0.5      | 0.5                  | >99       | –         | use of NH <sub>3</sub> gas (0.85 MPa)<br>instead of aqueous NH <sub>3</sub>          | S9        |
| 11             | MnO <sub>2</sub> /graphene oxide                    | water          | 150              | 3        | 3                    | –         | 97        | –                                                                                    | S10       |
| 12             | OMS-2                                               | 1,4-dioxane    | 130              | 3        | 0.3                  | 2         | 95        | –                                                                                    | S11       |
| 13             | Ru/MnO <sub>2</sub>                                 | <i>t</i> -AmOH | 100              | 3        | 0.5                  | >99       | –         | –                                                                                    | S12       |
| 14             | Ru(OH) <sub>x</sub> /Al <sub>2</sub> O <sub>3</sub> | THF            | 120              | 5        | 0.6 (air)            | 72        | –         | –                                                                                    | S13       |

<sup>a</sup>NCI-F/Cu = nitrogen-doped carbon-incarcerated iron/copper bimetallic nanoparticle. *t*-AmOH = *tert*-amyl alcohol. <sup>b</sup>Co-[Bmim]Br/C-700 = C-N-C catalysts prepared by the pyrolysis of carbon-supported Co-[Bmim]Br ([Bmim]Br = 1-butyl-3-methylimidazolium bromide) at 700 °C in N<sub>2</sub>. <sup>c</sup>Co<sub>3</sub>O<sub>4</sub>-NGr/C and Fe<sub>2</sub>O<sub>3</sub>-NGr/C were prepared by the pyrolysis of carbon-supported Co- and Fe-phenanthroline complexes at 800 °C in Ar. <sup>d</sup>Co-[MCNIm]Cl/C-800 = C-N-C catalysts prepared by the pyrolysis of carbon-supported Co-[MCNIm]Cl ([MCNIm]Cl = 1-methyl-3-cyanomethyl-1H-imidazolium chloride) at 800 °C in N<sub>2</sub>. <sup>e</sup>Meso-Co-N/C = mesoporous cobalt-coordinated nitrogen-doped carbon. <sup>f</sup>Meso-N/C-900 = mesoporous nitrogen-doped nanocarbon prepared by the pyrolysis of polypyridyl ligand 4,5-diazafluoren-9-one azine using template assisted synthesis. <sup>g</sup>Meso-N,B/C = metal-free mesoporous nitrogen- and boron-codoped nanocarbon.

**Table S2.** Effect of the combination of Mn<sup>2+</sup> and Mn<sup>7+</sup> salts on pH of the reaction solution and MnO<sub>2</sub> formation<sup>a</sup>

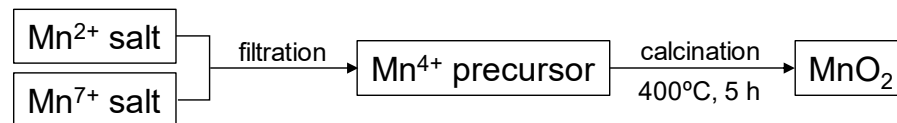

| entry            | Mn <sup>2+</sup> salt             | Mn <sup>7+</sup> salt | pH <sup>b</sup> | phase <sup>c</sup>               | $S_{\text{BET}}^d$<br>(m <sup>2</sup> g <sup>-1</sup> ) | bulk content (wt%)                           | A/Mn molar ratio<br>(A = Na, K) | AOS     |
|------------------|-----------------------------------|-----------------------|-----------------|----------------------------------|---------------------------------------------------------|----------------------------------------------|---------------------------------|---------|
| 1 <sup>e</sup>   | MnSO <sub>4</sub>                 | NaMnO <sub>4</sub>    | 0.7             | β ( <b>β-MnO<sub>2</sub>-1</b> ) | 106                                                     | Mn (65.5), Na (0.47), H <sub>2</sub> O (4.9) | 0.017                           | 3.7±0.1 |
| 2 <sup>e</sup>   | Mn(NO <sub>3</sub> ) <sub>2</sub> | NaMnO <sub>4</sub>    | 0.5             | β ( <b>β-MnO<sub>2</sub>-2</b> ) | 100                                                     | Mn (66.1), Na (0.40), H <sub>2</sub> O (2.8) | 0.014                           | 3.6±0.1 |
| 3 <sup>e,f</sup> | Mn(OAc) <sub>2</sub>              | NaMnO <sub>4</sub>    | 0.8             | β ( <b>β-MnO<sub>2</sub>-3</b> ) | 122                                                     | Mn (52.8), Na (0.36), H <sub>2</sub> O (4.4) | 0.016                           | 3.8±0.2 |
| 4 <sup>g</sup>   | Mn(NO <sub>3</sub> ) <sub>2</sub> | KMnO <sub>4</sub>     | 0.8             | β ( <b>β-MnO<sub>2</sub>-4</b> ) | 124                                                     | Mn (58.6), K (0.90), H <sub>2</sub> O (3.3)  | 0.022                           | 3.8±0.1 |
| 5 <sup>e</sup>   | MnSO <sub>4</sub>                 | KMnO <sub>4</sub>     | 0.8             | α                                | 99                                                      | Mn (63.1), K (3.06), H <sub>2</sub> O (4.3)  | 0.068                           | 3.6±0.1 |
| 6 <sup>e</sup>   | Mn(NO <sub>3</sub> ) <sub>2</sub> | KMnO <sub>4</sub>     | 0.5             | α                                | 133                                                     | Mn (66.0), K (1.94), H <sub>2</sub> O (7.3)  | 0.041                           | 3.6±0.1 |
| 7 <sup>e</sup>   | Mn(OAc) <sub>2</sub>              | KMnO <sub>4</sub>     | 4.6             | α                                | 80                                                      | Mn (66.3), K (2.65), H <sub>2</sub> O (3.7)  | 0.056                           | 3.5±0.1 |

<sup>a</sup> Detailed synthesis conditions are described in the experimental section. The description of hydrates of salts is omitted for clarity. <sup>b</sup> The pH values of the reaction solution were measured after stirring the mixed solution of Mn<sup>2+</sup> and Mn<sup>7+</sup> salts for 30 min. <sup>c</sup> Determined by XRD analysis for MnO<sub>2</sub>. <sup>d</sup>  $S_{\text{BET}}$ : Specific surface area of MnO<sub>2</sub>. <sup>e</sup> Data from reference 56. <sup>f</sup> pH was adjusted by addition of 0.5 M aqueous H<sub>2</sub>SO<sub>4</sub>. <sup>g</sup> **K-precursor** was treated in 0.1 M HNO<sub>3</sub> aqueous solution.

**Table S3.** Comparison of surface physicochemical properties of manganese oxides

|                                                     | $\beta$ -MnO <sub>2</sub> -1 <sup>c</sup> | $\beta$ -MnO <sub>2</sub> -3 <sup>c</sup> | $\beta$ -MnO <sub>2</sub> -4 | OMS-2 | activated MnO <sub>2</sub> |
|-----------------------------------------------------|-------------------------------------------|-------------------------------------------|------------------------------|-------|----------------------------|
| Oxidation states of surface Mn species <sup>a</sup> | 3.5                                       | 3.5                                       | 3.5                          | 3.3   | 3.6                        |
| Amounts of adsorbed oxygen species (%) <sup>a</sup> | 26                                        | 28                                        | 22                           | 16    | 21                         |
| Reduction rate (mmol g <sup>-1</sup> ) <sup>b</sup> | 1.4                                       | 1.7                                       | 1.5                          | 1.3   | 0.7                        |

<sup>a</sup> Estimated by XPS analysis. <sup>b</sup> Estimated by H<sub>2</sub>-TPR analysis. <sup>c</sup> Data from ref. 56.

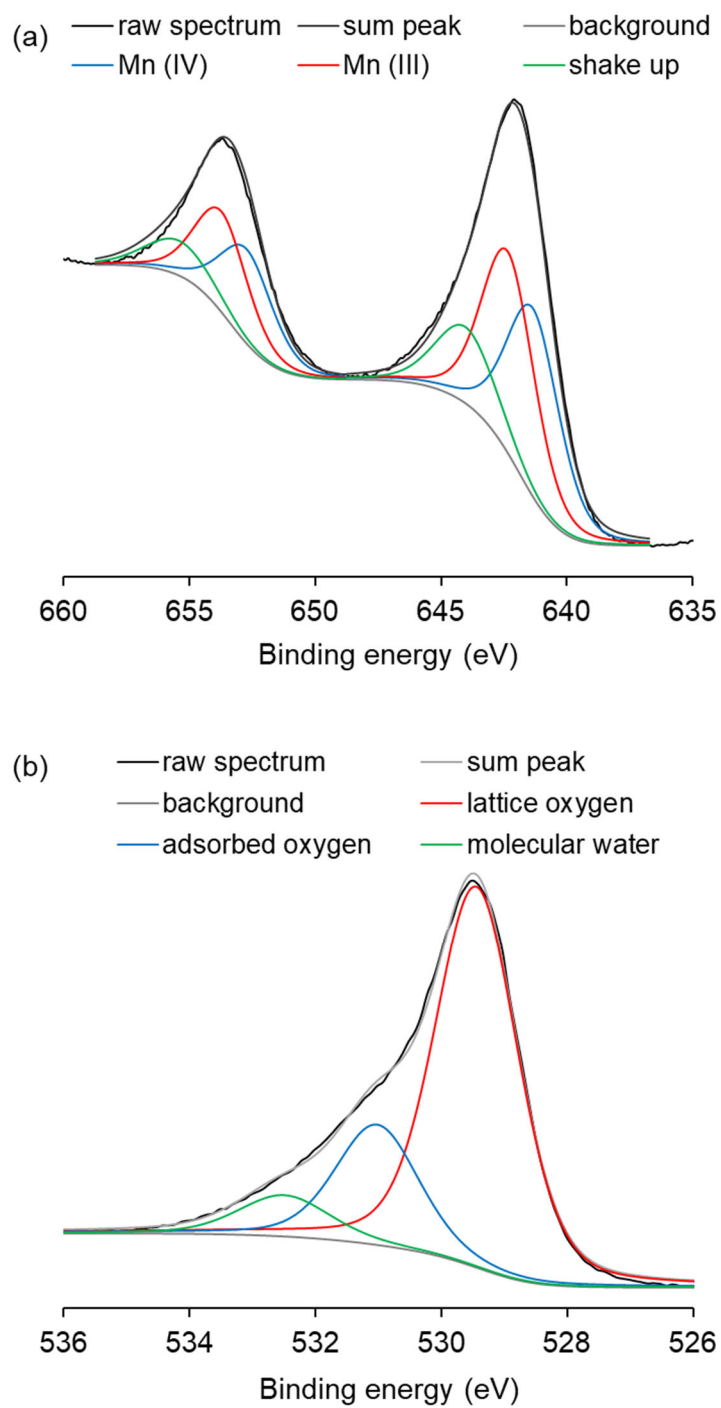

**Fig. S1.** XPS (a) Mn 2p and (b) O 1s spectra of  $\beta$ -MnO<sub>2</sub>-4.

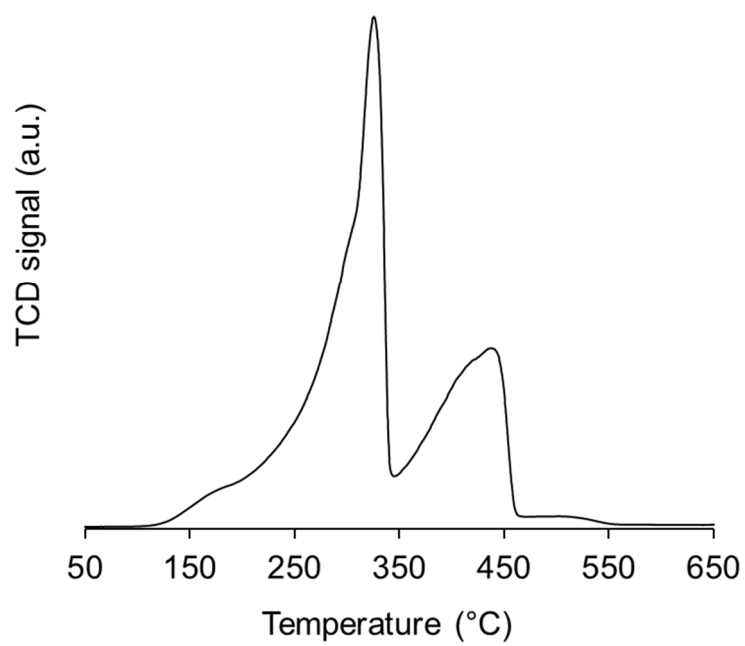

**Fig. S2.** H<sub>2</sub>-TPR profile for  $\beta$ -MnO<sub>2</sub>-4.

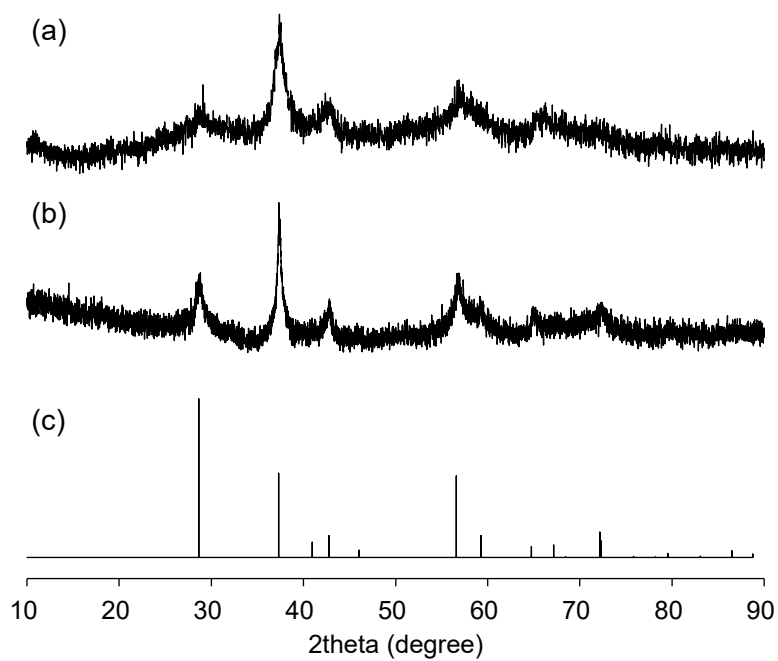

**Fig. S3.** XRD patterns for (a) fresh  $\beta\text{-MnO}_2\text{-1}$ , (b) recovered  $\beta\text{-MnO}_2\text{-1}$  after the one-pot oxidation of **1a** to **3a** under the conditions of Fig. 6(a), and (c) tetragonal  $\beta\text{-MnO}_2$  (JCPDS 01-081-2261).

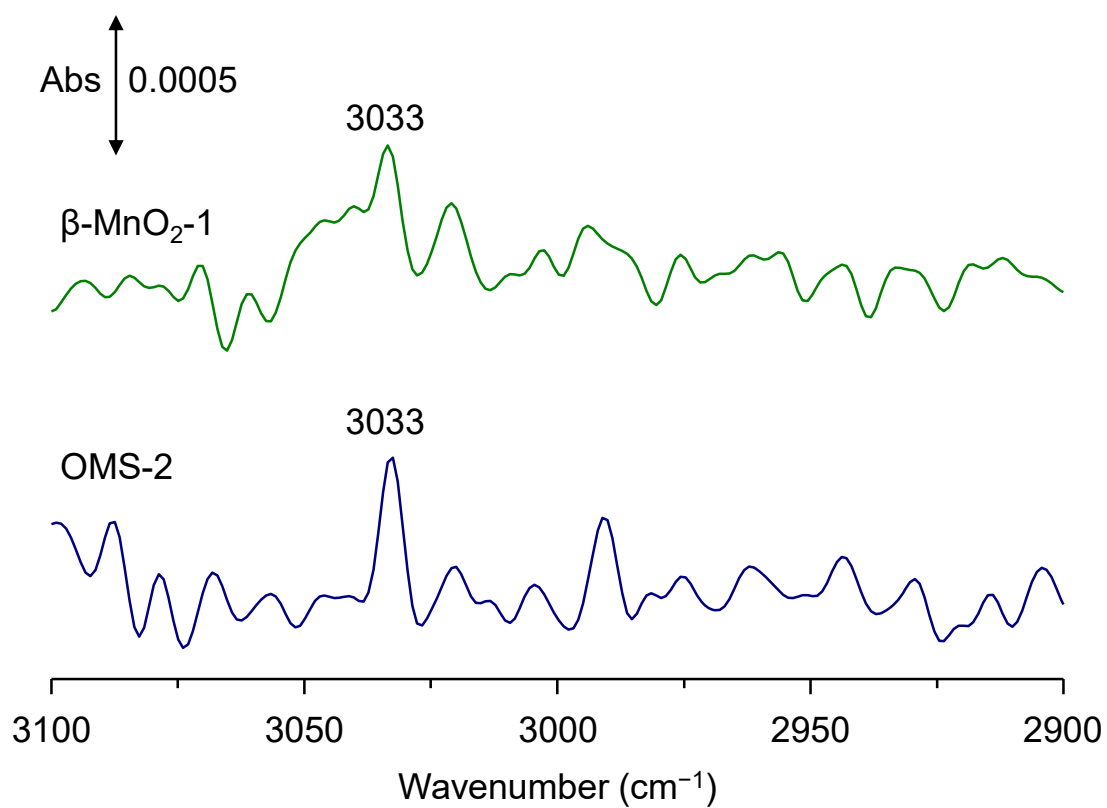

**Fig. S4.** Difference IR spectra for chloroform-adsorbed  $\beta\text{-MnO}_2\text{-1}$  and OMS-2 at  $25\text{ }^\circ\text{C}$ . Data of  $\beta\text{-MnO}_2\text{-1}$  from ref. 59.



### Data of products

**Benzaldehyde (2a):**  $^1\text{H}$  NMR (400 MHz,  $\text{CDCl}_3$ , TMS):  $\delta = 10.03$  (s, 1H), 7.90–7.88 (m, 2H), 7.64–7.62 (m, 1H), 7.56–7.52 (m, 2H).  $^{13}\text{C}\{^1\text{H}\}$  NMR (100 MHz,  $\text{CDCl}_3$ , TMS):  $\delta = 192.7, 136.8, 134.8, 130.1, 129.3$ . MS (EI):  $m/z$  (%): 106 ( $[M]^+$ , 100), 105 (96), 78 (15), 77 (83), 52 (8), 51 (29), 50 (16).

**4-Methyl benzaldehyde (2b):**  $^1\text{H}$  NMR (400 MHz,  $\text{CDCl}_3$ , TMS):  $\delta = 9.97$  (s, 1H), 7.78 (d,  $J = 8.1$  Hz, 2H), 7.33 (d,  $J = 7.9$  Hz, 2H), 2.44 (s, 3H);  $^{13}\text{C}\{^1\text{H}\}$  NMR (100 MHz,  $\text{CDCl}_3$ , TMS):  $\delta = 192.1, 145.7, 134.4, 130.0, 129.9, 22.0$ . MS (EI):  $m/z$  (%): 120 ( $[M]^+$ , 86), 119 (100), 91 (98), 65 (26), 63 (11), 39 (17).

**4-Methoxy benzaldehyde (2c):**  $^1\text{H}$  NMR (400 MHz,  $\text{CDCl}_3$ , TMS):  $\delta = 9.89$  (s, 1H), 7.84 (d, 2H,  $J = 8.8$  Hz), 7.01 (d, 2H,  $J = 8.8$  Hz), 3.89 (s, 3H).  $^{13}\text{C}\{^1\text{H}\}$  NMR (100 MHz,  $\text{CDCl}_3$ , TMS):  $\delta = 190.9, 164.8, 132.1, 130.1, 114.5, 55.7$ . MS (EI):  $m/z$  (%): 136 ( $[M]^+$ , 70), 135 (100), 107 (19), 92 (16), 77 (35).

**4-Chloro benzaldehyde (2d):**  $^1\text{H}$  NMR (400 MHz,  $\text{CDCl}_3$ , TMS):  $\delta = 9.99$  (s, 1H), 7.83 (d, 2H,  $J = 8.5$  Hz), 7.52 (d, 2H,  $J = 8.4$  Hz).  $^{13}\text{C}\{^1\text{H}\}$  NMR (100 MHz,  $\text{CDCl}_3$ , TMS):  $\delta = 191.0, 141.1, 137.8, 130.9, 129.4$ . MS (EI):  $m/z$  (%): 142 ( $[M+2]^+$ , 22), 141 ( $[M+1]^+$ , 36), 140 ( $[M]^+$ , 70), 139 (100), 113 (20), 111 (61), 77 (16), 75 (29), 74 (13), 51 (16), 50 (24).

**Methyl terephthalaldehyde (2e):**  $^1\text{H}$  NMR (400 MHz,  $\text{CDCl}_3$ , TMS):  $\delta = 10.11$  (s, 1H), 8.20 (d,  $J = 8.2$  Hz, 2H), 7.96 (d,  $J = 8.2$  Hz, 2H), 3.97 (s, 3H).  $^{13}\text{C}\{^1\text{H}\}$  NMR (100 MHz,  $\text{CDCl}_3$ , TMS):  $\delta = 191.7, 166.2, 139.3, 135.3, 130.3, 129.7, 52.7$ . MS (EI):  $m/z$  (%): 164 ( $[M]^+$ , 39), 163 (14), 133 (100), 105 (34), 77 (27), 76 (11), 51 (19), 50 (13).

**4-Nitro benzaldehyde (2f):**  $^1\text{H}$  NMR (400 MHz,  $\text{CDCl}_3$ , TMS):  $\delta = 10.17$  (s, 1H), 8.40 (d,  $J = 8.7$  Hz, 2H), 8.09 (d,  $J = 8.7$  Hz, 2H).  $^{13}\text{C}\{^1\text{H}\}$  NMR (100 MHz,  $\text{CDCl}_3$ , TMS):  $\delta = 190.4, 151.3, 140.2, 130.6, 124.5$ . MS (EI):  $m/z$  (%): 151 ( $[M]^+$ , 93), 150 (100), 105 (26), 104 (24), 92 (12), 77 (83), 76 (24), 75 (16), 74 (16), 65 (12), 51 (79), 50 (36).

**trans-Cinnamaldehyde (2g):**  $^1\text{H}$  NMR (400 MHz,  $\text{CDCl}_3$ , TMS):  $\delta = 9.71$  (d,  $J = 7.6$  Hz, 1H), 7.59–7.56 (m, 2H), 7.48 (d,  $J = 16.0$  Hz, 1H), 7.46–7.42 (m, 3H), 6.72 (dd,  $J = 16.0$  and 7.6 Hz, 1H).  $^{13}\text{C}\{^1\text{H}\}$  NMR (100 MHz,  $\text{CDCl}_3$ , TMS):  $\delta = 193.3, 153.0, 134.4, 131.6, 129.5, 129.0, 128.8$ . MS (EI):  $m/z$  (%): 132 ( $[M]^+$ , 77), 131 (100), 104 (29), 103 (67), 102 (12), 78 (40), 77 (48), 51 (31), 50 (12).

**2-Pyridinecarboxaldehyde (2h):**  $^1\text{H}$  NMR (400 MHz,  $\text{CDCl}_3$ , TMS):  $\delta = 10.09$  (d,  $J = 0.8$  Hz, 1H), 8.81–8.79 (m, 1H), 7.99–7.96 (m, 1H), 7.91–7.86 (m, 1H), 7.54–7.51 (m, 1H).  $^{13}\text{C}\{^1\text{H}\}$  NMR (100 MHz,  $\text{CDCl}_3$ , TMS):  $\delta = 193.7, 153.3, 150.6, 137.4, 128.1, 122.0$ . MS (EI):  $m/z$  (%): 107 ( $[M]^+$ , 23), 79 (100), 78 (48), 52 (75), 51 (46), 50 (21).

**2-Thiophenecarboxaldehyde (2i):**  $^1\text{H}$  NMR (400 MHz,  $\text{CDCl}_3$ , TMS):  $\delta = 9.50$  (dd,  $J =$

1.2 and 0.4 Hz, 1H), 7.78 (ddd,  $J = 4.0, 1.2, 0.4$  Hz, 1H), 7.77–7.76 (m, 1H), 7.23–7.21 (m, 1H).  $^{13}\text{C}\{1\text{H}\}$  NMR (100 MHz,  $\text{CDCl}_3$ , TMS):  $\delta = 183.2, 144.5, 136.4, 135.3, 128.6$ . MS (EI):  $m/z$  (%): 113 ( $[M+1]^+$ , 14), 112 ( $[M]^+$ , 97), 111 (100), 83 (18), 58 (12), 57 (10).

**Furfural (2j):**  $^1\text{H}$  NMR (400 MHz,  $\text{CDCl}_3$ , TMS):  $\delta = 9.67$  (s, 1H), 7.703–7.699 (m, 1H), 7.26 (dd,  $J = 3.6, 0.7$  Hz, 1H), 6.61 (dd,  $J = 3.6, 1.6$  Hz, 1H).  $^{13}\text{C}\{1\text{H}\}$  NMR (100 MHz,  $\text{CDCl}_3$ , TMS):  $\delta = 178.0, 153.2, 148.2, 121.0, 112.7$ . MS (EI):  $m/z$  (%): 96 ( $[M]^+$ , 100), 95 (96), 67 (11), 39 (56), 38 (18).

**2,5-Diformylfuran (2k):**  $^1\text{H}$  NMR (400 MHz,  $\text{CDCl}_3$ , TMS):  $\delta = 9.87$  (s, 1H), 7.34 (s, 1H).  $^{13}\text{C}\{1\text{H}\}$  NMR (100 MHz,  $\text{CDCl}_3$ , TMS):  $\delta = 179.3, 154.4, 119.3$ . MS (EI):  $m/z$  (%): 124 ( $[M]^+$ , 100), 123 (61), 95 (27), 39 (40), 38 (17).

**Acetophenone (2l):**  $^1\text{H}$  NMR (400 MHz,  $\text{CDCl}_3$ , TMS):  $\delta = 7.97$ –7.95 (m, 2H), 7.57–7.55 (m, 2H), 7.48–7.44 (m, 2H), 2.61 (s, 3H).  $^{13}\text{C}\{1\text{H}\}$  NMR (100 MHz,  $\text{CDCl}_3$ , TMS):  $\delta = 198.0, 137.2, 133.0, 128.5, 128.3, 26.5$ . MS (EI):  $m/z$  (%): 120 ( $[M]^+$ , 29), 105 (100), 77 (65), 51 (17).

**Benzophenone (2m):**  $^1\text{H}$  NMR (400 MHz,  $\text{CDCl}_3$ , TMS):  $\delta = 7.82$ –7.79 (m, 4H), 7.61–7.57 (m, 2H), 7.51–7.46 (m, 4H).  $^{13}\text{C}\{1\text{H}\}$  NMR (100 MHz,  $\text{CDCl}_3$ , TMS):  $\delta = 197.0, 138.0, 132.7, 130.4, 128.6$ . MS (EI):  $m/z$  (%): 182 ( $[M]^+$ , 47), 105 (100), 78 (18), 77 (56), 51 (18).

**2-Octanone (2n):**  $^1\text{H}$  NMR (400 MHz,  $\text{CDCl}_3$ , TMS):  $\delta = 2.42$  (t,  $J = 7.6$  Hz, 2H), 2.13 (s, 3H), 1.59–1.55 (m, 2H), 1.31–1.26 (m, 6H), 0.88 (t,  $J = 6.7$  Hz, 3H).  $^{13}\text{C}\{1\text{H}\}$  NMR (100 MHz,  $\text{CDCl}_3$ , TMS):  $\delta = 209.7, 44.2, 31.9, 30.2, 29.2, 24.2, 22.8, 14.3$ . MS (EI):  $m/z$  (%): 128 ( $[M]^+$ , 8), 85 (10), 71 (22), 59 (19), 58 (88).

**Benzonitrile (3a):**  $^1\text{H}$  NMR (400 MHz,  $\text{CDCl}_3$ , TMS):  $\delta = 7.67$ –7.59 (m, 3H), 7.48 (t,  $J = 7.8$  Hz, 2H).  $^{13}\text{C}\{1\text{H}\}$  NMR (100 MHz,  $\text{CDCl}_3$ , TMS):  $\delta = 133.1, 132.6, 129.5, 119.2, 112.8$ . MS (EI):  $m/z$  (%): 103 ( $[M]^+$ , 100), 76 (38), 50 (14).

**4-Methoxybenzonitrile (3b):**  $^1\text{H}$  NMR (400 MHz,  $\text{CDCl}_3$ , TMS):  $\delta = 7.59$  (d,  $J = 8.9$  Hz, 2H), 6.95 (d,  $J = 8.9$  Hz, 2H), 3.86 (s, 3H).  $^{13}\text{C}\{1\text{H}\}$  NMR (100 MHz,  $\text{CDCl}_3$ , TMS):  $\delta = 163.2, 134.3, 119.5, 115.1, 104.4, 55.9$ . MS (EI):  $m/z$  (%): 133 ( $[M]^+$ , 100), 90 (48), 103 (47), 63 (18), 64 (15), 104 (13), 76 (13), 39 (12), 118 (10).

**4-Methylbenzonitrile (3c):**  $^1\text{H}$  NMR (400 MHz,  $\text{CDCl}_3$ , TMS):  $\delta = 7.55$ –7.26 (m, 4H), 2.42 (s, 3H).  $^{13}\text{C}\{1\text{H}\}$  NMR (100 MHz,  $\text{CDCl}_3$ , TMS):  $\delta = 144.0, 132.4, 130.3, 119.5, 109.7, 22.2$ . MS (EI):  $m/z$  (%): 117 ( $[M]^+$ , 100), 116 (65), 90 (45), 89 (28), 63 (13), 39 (13).

**4-Chlorobenzonitrile (3d):**  $^1\text{H}$  NMR (400 MHz,  $\text{CDCl}_3$ , TMS):  $\delta = 7.60$  (d,  $J = 8.6$  Hz, 2H), 7.47 (d,  $J = 8.5$  Hz, 2H).  $^{13}\text{C}\{1\text{H}\}$  NMR (100 MHz,  $\text{CDCl}_3$ , TMS):  $\delta = 139.9, 133.7, 130.0, 118.3, 111.2$ . MS (EI):  $m/z$  (%): 137 ( $[M]^+$ , 100), 102 (36), 139 ( $[M+2]^+$ , 31), 75

(17), 50 (16).

**Methyl 4-cyanobenzoate (3e):**  $^1\text{H}$  NMR (400 MHz,  $\text{CDCl}_3$ , TMS):  $\delta$  = 8.14 (d,  $J$  = 7.6 Hz, 2H), 7.75 (d,  $J$  = 7.6 Hz, 2H), 3.96 (s, 3H).  $^{13}\text{C}\{1\text{H}\}$  NMR (100 MHz,  $\text{CDCl}_3$ , TMS):  $\delta$  = 165.8, 134.3, 132.6, 130.4, 118.3, 116.8. MS (EI):  $m/z$  (%): 130 (100), 102 (48), 161 ( $[M]^+$ , 17), 75 (15).

**4-Nitrobenzonitrile (3f):**  $^1\text{H}$  NMR (400 MHz,  $\text{CDCl}_3$ , TMS):  $\delta$  = 8.37 (d,  $J$  = 8.9 Hz, 2H), 7.90 (d,  $J$  = 8.9 Hz, 2H).  $^{13}\text{C}\{1\text{H}\}$  NMR (100 MHz,  $\text{CDCl}_3$ , TMS):  $\delta$  = 150.4, 133.8, 124.6, 118.7, 117.1. MS (EI):  $m/z$  (%): 102 (100), 75 (43), 148 ( $[M]^+$ , 42), 51 (25), 90 (24), 76 (22), 50 (20).

**Cinnamionitrile (3g):**  $^1\text{H}$  NMR (400 MHz,  $\text{CDCl}_3$ , TMS):  $\delta$  = 7.46–7.38 (m, 6H), 5.90 (d,  $J$  = 16.8 Hz, 1H).  $^{13}\text{C}\{1\text{H}\}$  NMR (100 MHz,  $\text{CDCl}_3$ , TMS):  $\delta$  = 150.9, 133.9, 131.5, 129.5, 127.7, 118.5, 96.7. MS (EI):  $m/z$  (%): 130 ( $[M+1]^+$ , 10), 129 ( $[M]^+$ , 100), 128 (29), 103 (16), 102 (47), 78 (11), 76 (13), 51 (19), 50 (11).

**4-Cyanopyridine (3h):**  $^1\text{H}$  NMR (400 MHz,  $\text{CDCl}_3$ , TMS):  $\delta$  = 8.82 (dd,  $J$  = 1.6 Hz and 4.7 Hz, 2H), 7.54 (dd,  $J$  = 1.6 Hz and 4.2 Hz, 2H).  $^{13}\text{C}\{1\text{H}\}$  NMR (100 MHz,  $\text{CDCl}_3$ , TMS):  $\delta$  = 151.1, 125.6, 120.8, 116.7. MS (EI):  $m/z$  (%): 104 ( $[M]^+$ , 100), 77 (66), 50 (24), 76 (19), 64 (15), 51 (15).

**2-Thiophenecarbonitrile (3i):**  $^1\text{H}$  NMR (400 MHz,  $\text{CDCl}_3$ , TMS):  $\delta$  = 7.65 (dd,  $J$  = 1.1 Hz and 3.8 Hz, 1H), 7.62 (dd,  $J$  = 1.1 Hz and 3.8 Hz, 1H), 7.15–7.13 (m, 1H).  $^{13}\text{C}\{1\text{H}\}$  NMR (100 MHz,  $\text{CDCl}_3$ , TMS):  $\delta$  = 137.7, 132.9, 128.0, 114.5, 110.3. MS (EI):  $m/z$  (%): 109 ( $[M]^+$ , 100), 58 (37), 45 (35).

**2-Furonitrile (3j):**  $^1\text{H}$  NMR (400 MHz,  $\text{CDCl}_3$ , TMS):  $\delta$  = 7.63 (d,  $J$  = 3.6 Hz, 1H), 7.15 (d,  $J$  = 0.9 Hz, 1H), 6.59–6.57 (m, 1H).  $^{13}\text{C}\{1\text{H}\}$  NMR (100 MHz,  $\text{CDCl}_3$ , TMS):  $\delta$  = 147.4, 125.8, 121.2, 111.3. MS (EI): 93 ( $[M]^+$ , 100), 64 (52), 38 (37), 65 (32), 39 (24), 37 (22).

## References

- S1. T. Yasukawa, X. Yang and S. Kobayashi, *J. Org. Chem.*, 2020, **85**, 7543–7548.
- S2. F. Ziaee, M. Gholizadeh and S. M. Seyedi, *Appl. Organomet. Chem.*, 2018, **32**, e4253.
- S3. Y.-Y. Xia, Q.-Y. Lv, H. Yuan and J.-Y. Wang, *Chem. Pap.*, 2021, **75**, 3957–3964.
- S4. R. V. Jagadeesh, H. Junge and M. Beller, *Nat. Commun.*, 2014, **5**, 4123.
- S5. F. Mao, Z. Qi, H. Fan, D. Sui, R. Chen and J. Huang, *RSC Adv.*, 2017, **7**, 1498–1503.

- S6. S. Shang, L. Wang, W. Dai, B. Chen, Y. Lv and S. Gao, *Catal. Sci. Technol.*, 2016, **6**, 5746–5753.
- S7. S. Shang, W. Dai, L. Wang, Y. Lv and S. Gao, *Chem. Commun.*, 2017, **53**, 1048–1051.
- S8. S. Shang, P.-P. Chen, L. Wang, Y. Lv, W.-X. Li and S. Gao, *ACS Catal.*, 2018, **8**, 9936–9944.
- S9. T. Ishida, H. Watanabe, T. Takei, A. Hamasaki, M. Tokunaga and M. Haruta, *Appl. Catal., A*, 2012, **425–426**, 85–90.
- S10. R. Nie, J. Shi, S. Xia, L. Shen, P. Chen, Z. Hou and F.-S. Xiao, *J. Mater. Chem.*, 2012, **22**, 18115–18118.
- S11. K. Yamaguchi, H. Kobayashi, Y. Wang, T. Oishi, Y. Ogasawara and N. Mizuno, *Catal. Sci. Technol.*, 2013, **3**, 318–327.
- S12. H. Wang, D. Xu, E. Guan, L. Wang, J. Zhang, C. Wang, S. Wang, H. Xu, X. Meng, B. Yang, B. C. Gates and F.-S. Xiao, *ACS Catal.*, 2020, **10**, 6299–6308.
- S13. T. Oishi, K. Yamaguchi and N. Mizuno, *Angew. Chem., Int. Ed.*, 2009, **48**, 6286–6288.
